# Supplementary material for: Use of Machine Learning Consensus Clustering to Identify Distinct Subtypes of Kidney Transplant Recipients With DGF and Associated Outcomes
Source: PubMed Central journal article supplement (PMC9773391; doi:10.3389/ti.2022.10810), 2022-12-08
Supplement: Table1.pdf [file Table1.pdf]

Table S1 – Missing Data

|                                   | Missing data<br>(total=17,073) |
|-----------------------------------|--------------------------------|
| Recipient Age                     | 0 (0)                          |
| Recipient sex                     | 0 (0)                          |
| Recipient race                    | 0 (0)                          |
| ABO blood group                   | 0 (0)                          |
| Body mass index                   | 0 (0)                          |
| Kidney retransplant               | 0 (0)                          |
| Kidney donor status               | 0 (0)                          |
| Dialysis duration                 | 70 (0.4)                       |
| Cause of end-stage kidney disease | 0 (0)                          |
| Comorbidity                       |                                |
| - Diabetes mellitus               | 7 (0.04)                       |
| - Malignancy                      | 0 (0)                          |
| - Peripheral vascular disease     | 142 (0.8)                      |
| PRA (%)                           | 489 (2.9)                      |
| HCV serostatus                    | 0 (0)                          |
| HBs antigen                       | 0 (0)                          |
| HIV serostatus                    | 0 (0)                          |
| Functional status                 | 491 (2.9)                      |
| Working income                    | 820 (4.8)                      |
| Insurance                         | 1 (0.01)                       |
| US resident                       | 1 (0.01)                       |
| Education                         | 393 (2.3)                      |
| Serum albumin                     | 706 (4.1)                      |
| Donor age                         | 0 (0)                          |
| Donor sex                         | 0 (0)                          |
| Donor race                        | 0 (0)                          |
| History of hypertension in donor  | 0 (0)                          |
| KDPI                              | 1 (0.01)                       |
| HLA mismatch                      | 17 (0.1)                       |
| Cold ischemia time                | 75 (0.4)                       |
| Kidney on pump                    | 0 (0)                          |
| Allocation type                   | 0 (0)                          |
| EBV status                        | 679 (4.0)                      |
| CMV status                        | 0 (0)                          |
| Induction immunosuppression       |                                |
| - Thymoglobulin                   | 0 (0)                          |
| - Alemtuzumab                     | 0 (0)                          |
| - Basiliximab                     | 0 (0)                          |
| - Other                           | 0 (0)                          |
| - No induction                    | 0 (0)                          |
| Maintenance Immunosuppression     |                                |
| - Tacrolimus                      | 0 (0)                          |

|                   |       |
|-------------------|-------|
| - Cyclosporine    | 0 (0) |
| - Mycophenolate   | 0 (0) |
| - Azathioprine    | 0 (0) |
| - mTOR inhibitors | 0 (0) |
| - Steroid         | 0 (0) |
